## Heart Slice Culture System Reliably Demonstrates Clinical Drug-Related Cardiotoxicity

Jessica M. Miller\*<sup>1,2</sup>; Moustafa H. Meki\*<sup>1,2</sup>; Qinghui Ou\*<sup>1</sup>; Sharon A. George\*<sup>3</sup>; Anna Gams<sup>3</sup>; Riham R. E. Abouleisa<sup>1</sup>; Xian-Liang Tang<sup>1</sup>; Brooke M. Ahern<sup>4</sup>; Guruprasad A. Giridharan<sup>2</sup>; Ayman El-Baz<sup>2</sup>; Bradford G. Hill<sup>5</sup>; Jonathan Satin<sup>4</sup>; Daniel J. Conklin<sup>5</sup>; Javid Moslehi<sup>6</sup>; Roberto Bolli<sup>1</sup>; Alexandre J. S. Ribeiro<sup>7</sup>; Igor R. Efimov<sup>3</sup>; Tamer M. A. Mohamed<sup>1,2,5,8,9,10</sup>.

<sup>1</sup>From the Institute of Molecular Cardiology, Department of Medicine, University of Louisville, KY, USA

<sup>2</sup>Department of Bioengineering, University of Louisville, KY, USA

<sup>3</sup>Department of Biomedical Engineering, The George Washington University, Washington, DC, USA

<sup>4</sup>Department of Physiology, University of Kentucky, KY, USA

<sup>5</sup>Envirome Institute, Diabetes and Obesity Center, Department of Medicine, University of Louisville, KY, USA

<sup>6</sup> Division of Cardiology, Cardio-Oncology Program, Vanderbilt University Medical Center, 2220 Pierce Avenue, Nashville, USA.

<sup>7</sup>U.S. Food and Drug Administration, Center for Drug Evaluation and Research, Office of Translational Science, Office of Clinical Pharmacology, Division of Applied Regulatory Science, Silver Spring, MD, USA

<sup>8</sup>Department of Pharmacology and Toxicology, University of Louisville, KY, USA

<sup>9</sup>Institute of Cardiovascular Sciences, University of Manchester, UK

<sup>10</sup>Faculty of Pharmacy, Zagazig University, Egypt

\* Authors equally contributed to the work.

### Correspondence to:

Tamer M A Mohamed, Institute of Molecular Cardiology, University of Louisville, 580 South Preston Street, Louisville, KY 40202. Email: [tamer.mohamed@louisville.edu](mailto:tamer.mohamed@louisville.edu)

Igor R Efimov, Department of Biomedical Engineering, The George Washington University, 5000 Science and Engineering Hall, Washington, DC 20052, USA. Email: [efimov@gwu.edu](mailto:efimov@gwu.edu)

Alexandre J. S. Ribeiro, U.S. Food and Drug Administration, Center for Drug Evaluation and Research, Office of Translational Science, Office of Clinical Pharmacology, Division of Applied Regulatory Science, Silver Spring, MD, USA. Email: [Alexandre.Ribeiro@fda.hhs.gov](mailto:Alexandre.Ribeiro@fda.hhs.gov)

## **Abstract**

The limited availability of human heart tissue and its complex cell composition are major limiting factors for reliable testing of drug efficacy, toxicity and understanding the mechanism. Recently, we developed a functional human and pig heart slice biomimetic culture system that fully preserves the viability and functionality of 300 $\mu$ m heart slices for 6 days. Here, we validated the reliability of this culture system in delineating the mechanisms of known anti-cancer drugs that cause cardiomyopathy. We tested three different anti-cancer drug categories associated with cardiomyopathy (doxorubicin, trastuzumab, and sunitinib). Heart slices are not only able to demonstrate the expected toxicity of doxorubicin and trastuzumab similar to hiPS-derived-cardiomyocytes (hiPSC-CMs); but they are superior to hiPSC-CMs in demonstrating sunitinib cardiotoxicity which is not detectable in hiPSC-CMs at low concentrations. These results indicate that heart slice tissue culture models have the potential to become a reliable platform for testing drug toxicity and mechanistic behavior.

## **Introduction**

In the past 30 years, cardiotoxicity induced by side effects of drugs on the electrical activity as well as on the contractility of cardiomyocytes has been the cause for 40% of all drug withdrawals from the market<sup>1</sup>. In addition, in the last decade, there has been an explosion of cancer therapies, some of which can lead to cardiotoxic effects, leading to cardiomyopathy, arrhythmias, irreversible heart failure or death<sup>2</sup>. For example, both traditional (e.g., anthracyclines and radiation) and targeted (e.g., trastuzumab) breast cancer therapies can result in cardiovascular complications in a subset of patients<sup>3, 4</sup>. The cardiovascular effects of newer agents, such as CDK4/6 inhibitors and PI3K inhibitors, are still unclear. The recent higher survival rates in cancer patients are affected by increased morbidity and mortality related to the cardiotoxic side effects of anti-cancer therapeutics<sup>5</sup>. Hence, a close collaboration between cardiologists and oncologists (in the emerging field of cardio-oncology) aims at making these complications manageable and ensuring that patients can be treated effectively<sup>2</sup>.

Detection of cardiotoxic effects of novel drugs requires the use of *in vivo* and *in vitro* studies prior to clinical trials<sup>6</sup>. Therefore, there is a growing need for reliable preclinical screening strategies for cardiovascular toxicities associated with emerging cancer therapies prior to human clinical trials. Animal models are expensive and fail to replicate many of the biochemical properties and hemodynamic aspects of the human heart and circulation<sup>7, 8</sup>. Currently, human induced pluripotent stem cell derived cardiomyocytes (hiPSC-CMs) are the most widely used platform to assess cardiotoxicity<sup>9, 10</sup>. However, the development of hiPSC-CMs microtissues with mature phenotypes is still work in progress<sup>11, 12</sup>; because these microtissues exhibit immature electrophysiology and lack cell-cell electrical coupling<sup>13</sup>. A less common approach has been the use of isolated primary human cardiomyocytes. While these cells are functionally mature, and can be used for high-throughput testing, they readily dedifferentiate in culture, thereby limiting their use for cardiotoxicity studies<sup>14</sup>. Moreover, the adult human heart tissue is structurally more

complicated, being composed of a heterogeneous mixture of various cell types including cardiomyocytes, endothelial cells, smooth muscle cells, and various types of stromal fibroblasts linked together with a sophisticated three-dimensional network of extracellular matrix proteins<sup>15</sup>. This heterogeneity of the non-cardiomyocyte cell population<sup>16-18</sup> in the adult heart is a major obstacle in modeling heart tissue using individual cell types. Human ventricular wedge preparations have also been used to study electrophysiology<sup>19, 20</sup>. However, the wedge preparations are typically large in size and have life-time limited to several hours, limiting their applicability to high-throughput applications.

These major limitations highlight the importance of developing optimal methods to enable the culture of intact cardiac tissue for studies involving physiological and pathological conditions<sup>13</sup>. Culturing human heart slices has shown promise in extending the functionality and viability of cardiac tissue. By retaining the normal tissue architecture, the multi-cell type environment, and the 3-dimensional structure, tissue slices can faithfully replicate the organ-level adult cardiac physiology in terms of normal conduction velocity, action potential duration, and intracellular calcium dynamics<sup>21, 22</sup>. Recently, we have developed a novel biomimetic culture system that maintains full viability and functionality of human and pig heart slices (300  $\mu\text{m}$  thickness) for 6 days in culture through optimization of the medium and culture conditions with continuous electrical stimulation at 1.2 Hz and oxygenation of the culture medium<sup>23</sup>. In the present study, we aim to validate the reliability of this culture system in recapitulating clinical toxicity and delineating the mechanisms of known cardiotoxic drugs. To this end, we tested three different classes of cancer therapies associated with cardiomyopathy, doxorubicin, trastuzumab, and sunitinib, at three different concentrations and assessed the effect of these drugs on heart slice viability, structure, function and transcriptome. In hiPSC-CMs doxorubicin and trastuzumab are shown to be cardiotoxic<sup>24, 25</sup>, however, sunitinib did not demonstrate any cardiotoxicity on hiPSC-CMs below 10  $\mu\text{M}$ <sup>26</sup>. In this study, we are demonstrating the clinical cardiotoxicity phenotype and mechanism of all three classes of cardiotoxins in heart slices,

which clearly emphasize the reliability and superiority of the heart slice platform compared to the currently used platforms for cardiotoxicity testing.

## **Results**

### **Effect of cardiotoxins on heart slices viability and cardiomyocyte integrity**

To demonstrate the ability of the heart slice culture to accurately replicate the clinical phenotype of known cardiotoxins, we selected three cancer therapies associated with cardiomyopathy in patients: Doxorubicin, anthracycline with a long history of cardiotoxicity; Trastuzumab, a monoclonal antibody target HER2; and, Sunitinib, a small molecule multi-targeted kinase inhibitor (TKI) with potent activity against VEGF and PDGF receptors<sup>4</sup>. All three drugs have been associated with cardiomyopathy<sup>4</sup>. We have tested three different concentrations of each drug in 10x incremental values to fully cover the pharmacokinetic blood levels of each drug with the lowest dose to be the most clinically relevant. As the blood concentration of doxorubicin ranges between 100nM-300nM<sup>27</sup>, we used 100nM, 1 $\mu$ M, 10 $\mu$ M concentrations. We used 1 $\mu$ g/mL, 10 $\mu$ g/mL and 100 $\mu$ g/mL concentrations for trastuzumab as the blood level is ranging between 1-10 $\mu$ g/mL<sup>28</sup>. Sunitinib concentrations of 100nM, 1 $\mu$ M, 10 $\mu$ M were used as the normal blood concentration range is 100nM-200nM<sup>29</sup>. Heart slice exposure to these concentrations of cardiotoxins for 48 h resulted in a significant decline in the general viability of the tissue as assessed by the MTT viability assay (Figure 1a). Structurally, following the tissue exposure to doxorubicin, there was a decrease in the gap junction protein, connexin-43, expression starting at the lowest concentration (Figure 1b). Heart slices treated with trastuzumab showed disruption in connexin-43 localization at the gap junction accompanied by a lower level of troponin expression starting at the lowest concentration (Figure 1b). Interestingly, low concentration sunitinib treatment did not appear to have an effect on the structure of the tissue slices; however, the higher concentrations showed more pronounced disruption of connexin-43 localization (Figure 1b).

## **Effect of cardiotoxins on heart slices calcium homeostasis**

We next tested the effects of cardiotoxins on the calcium homeostasis within the slices after 48 h exposure. All high concentrations of cardiotoxins completely abolished the calcium transients (Supp Movie 3, 4, 6, 7, 9 and 10) compared with the control (Supp movie 1), However, as the lower concentrations are more clinically relevant, they demonstrated several of the clinically-observed effects on the cardiac contractility and rhythm<sup>4</sup>. Treatment with 100 nM doxorubicin showed abolished calcium transients, indicating direct cardiomyocyte damage (Figure 2, Supp movie 2). Trastuzumab (1 µg) (Figure 2, Supp movie 5) or sunitinib (100 nM) (Figure 2, Supp movie 8) treatment resulted in severe disruption in calcium homeostasis within the heart slices.

## **Mechanistic understanding of the cardiotoxic effects**

Transcriptomic analyses were performed to understand the mechanism behind the responses of the heart slice to cardiotoxins. The top significant up/downregulated gene ontology (GO) terms for tissue treated with 100 nM of doxorubicin are shown in Figure 3a-c. The top downregulated GO terms were genes responsible for cardiac muscle and development as well as cellular division genes. The top upregulated GO terms were genes involved in oxidation/reduction and inflammatory response, which is consistent with the known free radical induction by doxorubicin. Figure 4a-c shows the up/downregulated genes in heart slices treated with 1 µg trastuzumab for 48 h. The downregulated genes are mainly contractile genes, which indicates a direct effect on the cardiomyocytes structure as reported before<sup>4</sup>. Figure 5a-c shows the up/downregulated GO terms in heart slices treated with 100 nM sunitinib. Sunitinib treatment resulted in significant downregulation in angiogenesis-related genes, consistent with its known clinical cardiotoxic phenotype of microvascular dysfunction in humans<sup>4</sup>. A major distinction between the heart slice preparation and hiPSC-CMs is the retention of multiple cell types in heart slices. Interestingly, sunitinib did not show any cardiotoxicity in hiPSC-CMs below 10 µM

as assessed by caspase3/7 apoptosis assay (Figure 6d-f). 60  $\mu$ M Sunitinib showed acute apoptotic response within one hour of addition, therefore, no more fluorescence detected over the course of the experiment using this concentration (Figure 6d-f). However, doxorubicin demonstrated the expected cardiotoxicity on hiPSC-CMs and the negative controls (aspirin and erlotinib (non-cardiotoxic TKI) did not show any cardiotoxic effect on hiPSC-CMs up to 60  $\mu$ M (Figure 6a-c).

### **Human heart slices can reliably and consistently predict doxorubicin cardiotoxicity**

The experiments described above were performed on pig hearts to ensure consistency between the tissues. However, the ultimate goal is to predict cardiotoxicity in human heart tissue, therefore, we used healthy human to demonstrate doxorubicin cardiotoxicity on functional and transcriptomics levels. To ensure reproducibility between the human hearts, we used 2 female and 4 male hearts in our experiments to demonstrate the effect of doxorubicin on heart slice functionality and gene expression. Consistent with the pig heart data, electrophysiological remodeling was also observed in human heart slices. Significant slowing of cardiac conduction velocity in the transverse direction of propagation in response to 50  $\mu$ M doxorubicin exposure for 24 h was observed in all human hearts used within the experiment<sup>30</sup> (Figure 7a-b). These results are consistent with reports of acute electrophysiologic alterations in some patients treated with doxorubicin<sup>31</sup>. Furthermore, Cap analysis of gene expression (CAGE) transcriptome analysis revealed 1433 differentially expressed genes in control and 2172 differentially expressed genes at the promoter level in doxorubicin-treated human cardiac slices as illustrated in (Figure 7c). GO analysis revealed that most differentially expressed genes were associated with DNA repair, oxidation-reduction, mitochondria viability and oxidative phosphorylation, which are likely to be related to the damage of the energetic capacity of the cardiomyocytes (Figure 7d). Hierarchical clustering analysis further illustrated different clustering of control and doxorubicin-treated human cardiac organotypic slices (Figure 7e).

Importantly, these analyses show the consistency of the transcriptomic response to doxorubicin among different human subjects (Figure 7e).

## **Discussion**

Drug-induced cardiotoxicity is a major cause of market withdrawal and failure of new drug candidates<sup>32</sup>. Therefore, there is a growing need for reliable preclinical screening strategies for cardiovascular toxicities associated with emerging cancer therapies prior to clinical trials. The recent move towards hiPSC-CMs to test drug toxicity provided a partial solution but not solved the overall problem. A single cell type does not replicate the complex phenotype of 3D heart tissue that contains multiple cell types and biological connections. For the first time, we are able to demonstrate the clinical cardiotoxic phenotype of 3 different categories of cardiotoxins using a 3D heart slice culture model.

The first drug category that we tested is anthracyclines, which is a class of antibiotics discovered over 60 years ago and used to treat many different cancers<sup>33</sup>. Doxorubicin is one of the commonly used anthracyclines for the treatment of lymphoma, leukemia, sarcoma, and breast cancer<sup>33</sup>. Doxorubicin's anticancer activities are due to its ability to disrupt DNA and RNA synthesis<sup>33</sup>, attenuate DNA repair<sup>34</sup>, and generate free radicals which damage the DNA<sup>35</sup>. Even though doxorubicin is an effective and commonly used anticancer therapy, its use is limited by its cardiotoxic effects. Between 5% and 23% of the patients that receive doxorubicin develop diminished exercise capacity and progressive heart failure symptoms<sup>36, 37</sup>. The mechanism(s) by which doxorubicin induces cardiotoxicity has been well studied for decades; doxorubicin has been found to induce multiple forms of direct cellular injury to cardiomyocytes as a result of free radical production induced by the quinone group<sup>38</sup>. This direct damage to cardiomyocytes has been demonstrated in hiPSC-CMs<sup>24, 26</sup>. Consistent with these reports, our pig and human heart slice models recapitulated the known response to doxorubicin, as our RNAseq data show downregulation of genes responsible for cardiac development and cellular division and



upregulation of genes involved in oxidation/reduction and inflammatory response, which is congruent with the known oxidative stress induced by doxorubicin<sup>26</sup>.

The second cardiotoxin category is HER2-targeted agents, a class of drugs that target and inhibit HER2/*neu* receptors (also known as ERBB2). Here we used trastuzumab, the first approved HER2-targeted agent<sup>39</sup>. Trastuzumab is a humanized monoclonal antibody that exerts its anticancer effect through blocking the activation of the HER2(ERBB2)/*neu* receptor, leading to the inhibition of epidermal growth factors/HER2 ligand receptor activity and disrupting the phosphorylation of tyrosine kinases which are critical regulators of the cell cycle<sup>39</sup>. It has been noted that trastuzumab treatment results in asymptomatic cardiac dysfunction and, less often, symptomatic heart failure in some patients<sup>40</sup>. trastuzumab-induced cardiotoxicity is thought to be due to the disruption of ERBB2/neuregulin signaling in cardiomyocytes, which is critical for normal myocyte growth, survival, and homeostasis<sup>41</sup>. The trastuzumab-induced direct cardiomyocyte damage phenotype and mechanism has been recently modeled in hiPSC-CMs<sup>25, 42</sup>. Consistent with these findings, heart slices treated with trastuzumab showed direct cardiomyocyte damage, as evidenced by disruption of calcium homeostasis and downregulation of cardiac contractile gene expression.

The third category of cardiotoxins tested is the tyrosine kinase and angiogenesis inhibitors (TKIs), which directly inhibits angiogenesis through inhibition of vascular endothelial growth factor (VEGF). This is usually accompanied by cardiovascular toxicity such as increased blood pressure<sup>43</sup>. Other direct cardiac toxicities included cardiac systolic dysfunction, which has been observed in patients treated with sunitinib and sorafenib<sup>44</sup> and has been attributed to the disruption of the coronary microvascular pericytes leading to hypoxia of cardiomyocytes<sup>45</sup> and cardiomyopathy. It was not possible to model these indirect effects using hiPSC-CMs, as sunitinib treatment up to 10 $\mu$ M has no obvious cardiotoxic effects on hiPSC-CMs due to its indirect effect on cardiomyocytes as indicated by our own data and others<sup>26</sup>. However, in our

heart slice system we were able to demonstrate clearly that although sunitinib (as low as 100nM) causes no major damage to the cardiomyocyte structure, it induces disruption of the angiogenic gene program in the heart tissue, which is consistent with the clinical phenotype observed in patients.

In conclusion, the results of this study suggest that the heart slices culture system is superior to the currently used models of hiPSC-CMs in modeling the cardiotoxicity phenotype and mechanism of three different classes of cardiotoxins. These data suggest that this system will be useful to test acute cardiotoxicity testing in the pharmaceutical industry and drug regulatory agencies.

## **Methods**

**Harvesting porcine heart tissue:** All animal procedures were in accordance with the institutional guidelines and approved by the University of Louisville Institutional Animal Care and Use Committee. The protocol for harvesting pig hearts has been described in detail<sup>23, 46</sup>. Briefly, following deeply anesthetizing the pig with 5% isoflurane, pig heart was quickly excised out and the heart was clamped at the aortic arch and perfused with 1L sterile cardioplegia solution (110 mM NaCl, 1.2 mM CaCl<sub>2</sub>, 16 mM KCl, 16 mM MgCl<sub>2</sub>, 10 mM NaHCO<sub>3</sub>, 5 units/mL heparin, pH to 7.4), then the heart was preserved on an ice-cold cardioplegic solution and immediately transported to the lab on wet ice.

**Human heart Slices:** Donor hearts that were not used in transplantation were acquired through our collaboration with the Washington Regional Transplant Community. Human cardiac organotypic slices were prepared as previously described<sup>30, 47</sup>.

**Heart slicing and culturing:** Slicing and culturing 300 µm thick heart tissue slices were performed as previously described in<sup>23, 46</sup>. A refined oxygenated growth medium was used (Medium 199, 1x ITS supplement, 10% FBS, 5 ng/mL VEGF, 10 ng/mL FGF-basic, and 2x

Antibiotic-Antimycotic), and changed 3 times/day. Sunitinib (Tocris Inc.) (100 nM, 1 $\mu$ M, and 10  $\mu$ M), trastuzumab (InvivoGen Inc.) (1  $\mu$ g, 10  $\mu$ g, and 100  $\mu$ g), or doxorubicin (Sigma Millipore Inc.) (100 nM, 1 $\mu$ M, and 10  $\mu$ M, and 50  $\mu$ M) was added freshly to the culture medium at each medium change. Control slices received DMSO at the same dilution factor as the drug-treated slices.

**MTT viability assay:** For the MTT assay we used the Vybrant<sup>®</sup> MTT Cell Proliferation Assay kit (Thermo Scientific) following the manufacturer's protocol with slight modifications. Using a sterile scalpel, each heart slice was cut into 2 ~0.5 cm<sup>2</sup>-sized sections for the MTT assay. The heart slice segments were placed into a single well of a 12-well plate containing 0.9 mL growth media with 0.1 mL of reconstituted MTT substrate that was prepared according to the manufacturer's protocol. The tissue was incubated at 37°C for 3 h. During this time, viable tissue metabolized the MTT substrate and produced a purple color formazan compound. To extract the purple formazan from the tissue slices, the tissue was transferred into 1 mL of DMSO and incubated at 37°C for 15 min. The resulting solution was purple in color. This solution was then transferred into a clear bottom 96-well plate in triplicate at 3 dilutions, 1:2, 1:5, and 1:10. The intensity of the purple color was measured using cytation 1 plate reader (BioTek) at 570 nm. The readings were normalized to the weight of each heart tissue section and converted into OD/mg tissue. The 3 dilutions of the solution were performed to correct for any possible signal saturation and the average of all readings was normalized to their dilution factor.

**Heart slice fixation, mounting and immunofluorescence:** Heart slices were fixed with 4% paraformaldehyde for 48 h. Fixed tissue was dehydrated in 10% sucrose for 1 hour, 20% sucrose for 1 h, and 30% for overnight. The dehydrated tissue was then embedded in optimal cutting temperature compound (OCT compound) and gradually frozen in isopentane/dry ice bath. OCT embedded blocks were stored at -80°C until sectioning. 8  $\mu$ m sections were cut and immunolabeled for target proteins using the following procedure: To remove the OCT

compound, the slides were heated for 5 min at 95°C until the OCT compound melted. Then 1 mL of PBS was added to each slide and incubated at RT for 10-30 min until the OCT compound washed off. Sections were then permeabilized by incubating for 30 min in 0.1% Triton-X in PBS at RT. The Triton-X was removed, and non-specific antibody binding of the sections were blocked with 3% BSA solution for 1 h at RT. After washing the BSA off with PBS, each section was marked off with a wax pen. After marking sections off, the primary antibodies (1:200 dilution in 1% BSA) connexin 43 (Abcam; #AB11370), troponin-T (Thermo Scientific; #MA5-12960)] were added to each section and incubated for 90 min at RT. The primary antibodies were washed off with PBS three times followed by the addition of the secondary antibodies (1:200 dilution in 1% BSA) anti-Ms AlexaFluor 488 (Thermo Scientific; #A16079), anti-Rb AlexaFluor 594 (Thermo Scientific; #T6391) and incubated for 90 min at RT. The secondary antibody was removed by washing the sections 3 times with PBS. To distinguish the *bona fide* target staining from the background, we used a secondary antibody only as a control. After 3 times PBS washes, DAPI was added for 15 min. The sections were washed again 3 times with PBS. Finally, slices were mounted in vectashield (Vector Laboratories) and sealed with nail polish. All immunofluorescence imaging and quantification were performed using a Cytation 1 high content imager and the fluorescent signal quantification and masking were performed using the Gen5 software.

**Calcium-transient assessment:** Calcium transients were assessed as previously described<sup>23</sup>. Briefly, heart slices were loaded with Fluo-4 for 30 min at room temperature before being transferred to the imaging chamber. The loading solution contained a 1:10 mixture of 5 mM Fluo-4 AM in dry DMSO and Powerload<sup>TM</sup> concentrate (Invitrogen), which was diluted 100-fold into extracellular Tyrode's solution (NaCl 140mM; KCl 4.5mM; glucose 10mM; HEPES 10mM; MgCl<sub>2</sub> 1mM; CaCl<sub>2</sub> 1.8mM; 2x Antibiotic-Antimycotic; pH 7.4). Additional 20 min were allowed for de-esterification before recordings were taken. Contractions and calcium transients

were evoked by applying voltage pulses at 1 Hz between platinum wires placed on either side of the heart slice and connected to a field stimulator (IonOptix, Myopacer). Fluo-4 fluorescence transients were recorded via a standard filter set (#49011 ET, Chroma Technology). Resting fluorescence was recorded after cessation of pacing, and background light was obtained after removing the heart slice from the field of view at the end of the experiment. All analyses of calcium transients were based on calcium transients recorded from single cardiomyocytes within the heart slice and the calcium transient's amplitude was assessed as the average of 10 consecutive beats from each cell. Calcium transients and amplitude was assessed following normalization to the basal fluorescence of each cell and represented as  $F/F_0$ .

**RNA Sequencing:** RNA was isolated from the heart slices by using the Qiagen miRNeasy Micro Kit, #210874, following the manufacturer's protocol after homogenization of tissue in Trizol. RNAseq library preparation, sequencing, and data analysis were performed as described previously<sup>23</sup>.

**Optical Mapping:** Slices were incubated with Di-4-ANEPPS (30  $\mu$ l of stock solution at 1.25 mg/mL diluted to 1 mL with recovery solution(140 mM NaCl, 4.5 mM KCl, 1 mM MgCl<sub>2</sub>, 1.8 mM CaCl<sub>2</sub>, 10 mM glucose, 10 mM HEPES, 10 mM BDM; pH 7.4)) for single parameter voltage optical mapping. Slices were paced at 1 Hz frequency, 2 ms duration at an amplitude of 1.5X the threshold for stimulation using a platinum bipolar pacing wire positioned at the center of the slice. Slices were excited using excitation light at  $520 \pm 5$  nm and the emitted light was collected by a tandem lens optical mapping system, filtered using a  $610 \pm 20$  nm filter and recorded using the SciMedia Ultima L-type CMOS cameras.

Optical signals were analyzed as previously described<sup>30, 47</sup>. Briefly, activation times were defined as the time of maximum first derivative of the fluorescence signal during the upstroke. End of action potential and calcium transients were defined as the point where the signal returns

to 80% of its total signal amplitude. Conduction velocity was determined in the transverse direction of propagation using activation times and known interpixel resolution.

**Cap analysis of gene expression:** For high-throughput analysis of transcriptional starting point and identification of promoter usage, we performed cap analysis of gene expression (CAGE). Total RNA from the cultured slices was extracted using the RNeasy Fibrous Tissue Mini Kit according to the manufacturer's protocol. Library preparation and sequencing with HiSeq2500 was performed according to the Morioka *et al* protocol<sup>48</sup>. Read mapping was performed with Burrows-Wheeler Aligner<sup>49</sup>; subsequent analysis of reads into decomposition peak identification (DPI) and transcription start site-like peaks was performed with *DPI1* (<https://github.com/hkawaji/dpi1/>) followed by *TomeTools TSSClassifier* (<https://sourceforge.net/projects/tometools/>). Differential expression analysis was performed with *edgeR*<sup>50</sup>, gene ontology (GO) with *limma*<sup>51</sup>, and heatmap plotting with *pheatmap* (<https://CRAN.R-project.org/package=pheatmap>).

### **Apoptotic assay on hiPSC-CMs**

hiPSC-CMs were purchased from Cellular Dynamics (Currently FujiFilm Inc.). These hiPSC-CMs have been selected after differentiation using an  $\alpha$ -MHC-Blastocidin selection cassette. This strategy yields nearly 100% pure hiPSC-CMs. hiPSC-CMs were re-plated on fibronectin coated plates and cultured in RPMI medium with B27 supplement. Live cell brightfield and fluorescent images for time-lapse experiments were acquired using the Incucyte® S3 Live Cell Analysis System (Essen Bioscience / Sartorius) running version 2019A (20191.1.6976.19779). Plates were imaged hourly following initiation of drug treatment. Three images at set locations within each well were acquired at 10x magnification for each time point. For fluorescent imaging of apoptosis, the Incucyte Caspase-3/7 Green dye (Essen Bioscience 4440) was added to the media/drug cocktail at a concentration of 5  $\mu$ M for the duration of the assay. Analysis of apoptosis using the Caspase 3/7 fluorescent dye was performed using the Incucyte software.

Parameters were set to quantify green fluorescent intensity metrics and areas of high signal intensity are marking cell death.

## **References**

1. Kocadal K, Saygi S, Alkas FB and Sardas S. Drug-associated cardiovascular risks: A retrospective evaluation of withdrawn drugs. *North Clin Istanbul*. 2019;6:196-202.
2. Mercurio G, Cadeddu C, Piras A, Dessi M, Madeddu C, Deidda M, Serpe R, Massa E and Mantovani G. Early epirubicin-induced myocardial dysfunction revealed by serial tissue Doppler echocardiography: correlation with inflammatory and oxidative stress markers. *The oncologist*. 2007;12:1124-33.
3. Lenneman CG and Sawyer DB. Cardio-Oncology: An Update on Cardiotoxicity of Cancer-Related Treatment. *Circulation Research*. 2016;118:1008-20.
4. Moslehi JJ. Cardiovascular Toxic Effects of Targeted Cancer Therapies. *The New England journal of medicine*. 2016;375:1457-1467.
5. Han X, Zhou Y and Liu W. Precision cardio-oncology: understanding the cardiotoxicity of cancer therapy. *NPJ precision oncology*. 2017;1:31.
6. Hughes JP, Rees S, Kalindjian SB and Philpott KL. Principles of early drug discovery. *British journal of pharmacology*. 2011;162:1239-49.
7. Hearse DJ and Sutherland FJ. Experimental models for the study of cardiovascular function and disease. *Pharmacological research*. 2000;41:597-603.
8. Houser SR, Margulies KB, Murphy AM, Spinale FG, Francis GS, Prabhu SD, Rockman HA, Kass DA, Molckentin JD, Sussman MA and Koch WJ. Animal Models of Heart Failure. *Circulation Research*. 2012;111:131-150.
9. Chi KR. Revolution dawning in cardiotoxicity testing. *Nature Reviews Drug Discovery*. 2013;12:565-567.

10. Itzhaki I, Maizels L, Huber I, Zwi-Dantsis L, Caspi O, Winterstern A, Feldman O, Gepstein A, Arbel G, Hammerman H, Boulos M and Gepstein L. Modelling the long QT syndrome with induced pluripotent stem cells. *Nature*. 2011;471:225-229.
11. Gintant G, Burrige P, Gepstein L, Harding S, Herron T, Hong C, Jalife J and Wu JC. Use of Human Induced Pluripotent Stem Cell-Derived Cardiomyocytes in Preclinical Cancer Drug Cardiotoxicity Testing: A Scientific Statement From the American Heart Association. *Circulation Research*. 2019;125:e75-e92.
12. Pang L, Sager P, Yang X, Shi H, Sannajust F, Brock M, Wu JC, Abi-Gerges N, Lyn-Cook B, Berridge BR and Stockbridge N. Workshop Report: FDA Workshop on Improving Cardiotoxicity Assessment With Human-Relevant Platforms. *Circulation Research*. 2019;125:855-867.
13. Ronaldson-Bouchard K, Ma SP, Yeager K, Chen T, Song L, Sirabella D, Morikawa K, Teles D, Yazawa M and Vunjak-Novakovic G. Advanced maturation of human cardiac tissue grown from pluripotent stem cells. *Nature*. 2018;556:239-243.
14. Bird SD, Doevendans PA, van Rooijen MA, Brutel de la Riviere A, Hassink RJ, Passier R and Mummery CL. The human adult cardiomyocyte phenotype. *Cardiovascular Research*. 2003;58:423-434.
15. Pinto AR, Ilinykh A, Ivey MJ, Kuwabara JT, D'Antoni ML, Debuque R, Chandran A, Wang L, Arora K, Rosenthal NA and Tallquist MD. Revisiting Cardiac Cellular Composition. *Circulation Research*. 2016;118:400-9.
16. Kanisicak O, Khalil H, Ivey MJ, Karch J, Maliken BD, Correll RN, Brody MJ, SC JL, Aronow BJ, Tallquist MD and Molkentin JD. Genetic lineage tracing defines myofibroblast origin and function in the injured heart. *Nature Communications*. 2016;7:12260.
17. Fu X, Khalil H, Kanisicak O, Boyer JG, Vagnozzi RJ, Maliken BD, Sargent MA, Prasad V, Valiente-Alandi I, Blaxall BC and Molkentin JD. Specialized fibroblast differentiated states



underlie scar formation in the infarcted mouse heart. *Journal of Clinical Investigations*.

2018;128:2127-2143.

18. Kretzschmar K, Post Y, Bannier-Helaouet M, Mattiotti A, Drost J, Basak O, Li VSW, van den Born M, Gunst QD, Versteeg D, Kooijman L, van der Elst S, van Es JH, van Rooij E, van den Hoff MJB and Clevers H. Profiling proliferative cells and their progeny in damaged murine hearts. *Proceedings of the National Academy of Sciences of the United States of America*.

2018;115:E12245-E12254.

19. Glukhov AV, Fedorov VV, Kalish PW, Ravikumar VK, Lou Q, Janks D, Schuessler RB, Moazami N and Efimov IR. Conduction Remodeling in Human End-Stage Nonischemic Left Ventricular Cardiomyopathy. *Circulation*. 2012;125:1835-1847.

20. Lou Q, Fedorov VV, Glukhov AV, Moazami N, Fast VG and Efimov IR. Transmural Heterogeneity and Remodeling of Ventricular Excitation-Contraction Coupling in Human Heart Failure. *Circulation*. 2011;123:1881-1890.

21. Kang C, Qiao Y, Li G, Baechle K, Camelliti P, Rentschler S and Efimov IR. Human Organotypic Cultured Cardiac Slices: New Platform For High Throughput Preclinical Human Trials. *Scientific Reports*. 2016;6:28798.

22. Camelliti P, Al-Saud SA, Smolenski RT, Al-Ayoubi S, Bussek A, Wettwer E, Banner NR, Bowles CT, Yacoub MH and Terracciano CM. Adult human heart slices are a multicellular system suitable for electrophysiological and pharmacological studies. *Journal of molecular and cellular cardiology*. 2011;51:390-398.

23. Ou Q, Jacobson Z, Abouleisa RRE, Tang XL, Hindi SM, Kumar A, Ivey KN, Giridharan G, El-Baz A, Brittan K, Rood B, Lin YH, Watson SA, Perbellini F, McKinsey TA, Hill BG, Jones SP, Terracciano CM, Bolli R and Mohamed TMA. Physiological Biomimetic Culture System for Pig and Human Heart Slices. *Circulation Research*. 2019;125:628-642.

24. Burridge PW, Li YF, Matsa E, Wu H, Ong SG, Sharma A, Holmstrom A, Chang AC, Coronado MJ, Ebert AD, Knowles JW, Telli ML, Witteles RM, Blau HM, Bernstein D, Altman RB

and Wu JC. Human induced pluripotent stem cell-derived cardiomyocytes recapitulate the predilection of breast cancer patients to doxorubicin-induced cardiotoxicity. *Nat Med*.

2016;22:547-56.

25. Kitani T, Ong SG, Lam CK, Rhee JW, Zhang JZ, Oikonomopoulos A, Ma N, Tian L, Lee J, Telli ML, Witteles RM, Sharma A, Sayed N and Wu JC. Human-Induced Pluripotent Stem Cell Model of Trastuzumab-Induced Cardiac Dysfunction in Patients With Breast Cancer. *Circulation*.

2019;139:2451-2465.

26. Zhao L and Zhang B. Doxorubicin induces cardiotoxicity through upregulation of death receptors mediated apoptosis in cardiomyocytes. *Scientific Reports*. 2017;7:44735.

27. Barpe DR, Rosa DD and Froehlich PE. Pharmacokinetic evaluation of doxorubicin plasma levels in normal and overweight patients with breast cancer and simulation of dose adjustment by different indexes of body mass. *Eur J Pharm Sci*. 2010;41:458-63.

28. Stemmler HJ, Schmitt M, Willems A, Bernhard H, Harbeck N and Heinemann V. Ratio of trastuzumab levels in serum and cerebrospinal fluid is altered in HER2-positive breast cancer patients with brain metastases and impairment of blood-brain barrier. *Anticancer Drugs*.

2007;18:23-8.

29. Takasaki S, Kawasaki Y, Kikuchi M, Tanaka M, Suzuka M, Noda A, Sato Y, Yamashita S, Mitsuzuka K, Saito H, Ito A, Yamaguchi H, Arai Y and Mano N. Relationships between sunitinib plasma concentration and clinical outcomes in Japanese patients with metastatic renal cell carcinoma. *Int J Clin Oncol*. 2018;23:936-943.

30. George SA, Brennan JA and Efimov IR. Preclinical Cardiac Electrophysiological Assessment by Dual Voltage and Calcium Optical Mapping of Human Organotypic Cardiac Slices. *J Vis Exp*. In Press.

31. Cai F, Luis MAF, Lin X, Wang M, Cai L, Cen C and Biskup E. Anthracycline-induced cardiotoxicity in the chemotherapy treatment of breast cancer: Preventive strategies and treatment. *Mol Clin Oncol*. 2019;11:15-23.

32. Onakpoya IJ, Heneghan CJ and Aronson JK. Post-marketing withdrawal of 462 medicinal products because of adverse drug reactions: a systematic review of the world literature. *BioMed Central Medicine*. 2016;14:10.
33. Geisberg CA and Sawyer DB. Mechanisms of anthracycline cardiotoxicity and strategies to decrease cardiac damage. *Curr Hypertens Rep*. 2010;12:404-10.
34. Pang B, Qiao X, Janssen L, Velds A, Groothuis T, Kerkhoven R, Nieuwland M, Ovaa H, Rottenberg S, van Tellingen O, Janssen J, Huijgens P, Zwart W and Neefjes J. Drug-induced histone eviction from open chromatin contributes to the chemotherapeutic effects of doxorubicin. *Nature Communications*. 2013;4:1908.
35. Zhang S, Liu X, Bawa-Khalfe T, Lu LS, Lyu YL, Liu LF and Yeh ET. Identification of the molecular basis of doxorubicin-induced cardiotoxicity. *Nat Med*. 2012;18:1639-42.
36. Steinherz LJ, Steinherz PG, Tan CT, Heller G and Murphy ML. Cardiac toxicity 4 to 20 years after completing anthracycline therapy. *JAMA*. 1991;266:1672-7.
37. Cardinale D, Colombo A, Lamantia G, Colombo N, Civelli M, De Giacomo G, Rubino M, Veglia F, Fiorentini C and Cipolla CM. Anthracycline-induced cardiomyopathy: clinical relevance and response to pharmacologic therapy. *J Am Coll Cardiol*. 2010;55:213-20.
38. Horenstein MS, Vander Heide RS and L'Ecuyer TJ. Molecular basis of anthracycline-induced cardiotoxicity and its prevention. *Mol Genet Metab*. 2000;71:436-44.
39. Slamon DJ, Leyland-Jones B, Shak S, Fuchs H, Paton V, Bajamonde A, Fleming T, Eiermann W, Wolter J, Pegram M, Baselga J and Norton L. Use of chemotherapy plus a monoclonal antibody against HER2 for metastatic breast cancer that overexpresses HER2. *The New England journal of medicine*. 2001;344:783-92.
40. Onitilo AA, Engel JM and Stankowski RV. Cardiovascular toxicity associated with adjuvant trastuzumab therapy: prevalence, patient characteristics, and risk factors. *Ther Adv Drug Saf*. 2014;5:154-66.

41. Crone SA, Zhao YY, Fan L, Gu Y, Minamisawa S, Liu Y, Peterson KL, Chen J, Kahn R, Condorelli G, Ross J, Jr., Chien KR and Lee KF. ErbB2 is essential in the prevention of dilated cardiomyopathy. *Nat Med.* 2002;8:459-65.
42. Kurokawa YK, Shang MR, Yin RT and George SC. Modeling trastuzumab-related cardiotoxicity in vitro using human stem cell-derived cardiomyocytes. *Toxicol Lett.* 2018;285:74-80.
43. Pouessel D and Culine S. High frequency of intracerebral hemorrhage in metastatic renal carcinoma patients with brain metastases treated with tyrosine kinase inhibitors targeting the vascular endothelial growth factor receptor. *Eur Urol.* 2008;53:376-81.
44. Uraizee I, Cheng S and Moslehi J. Reversible cardiomyopathy associated with sunitinib and sorafenib. *The New England journal of medicine.* 2011;365:1649-50.
45. Chintalgattu V, Rees ML, Culver JC, Goel A, Jiffar T, Zhang J, Dunner K, Jr., Pati S, Bankson JA, Pasqualini R, Arap W, Bryan NS, Taegtmeyer H, Langley RR, Yao H, Kupferman ME, Entman ML, Dickinson ME and Khakoo AY. Coronary microvascular pericytes are the cellular target of sunitinib malate-induced cardiotoxicity. *Sci Transl Med.* 2013;5:187ra69.
46. Ou Q, Abouleisa RRE, Tang XL, Juhardeen HR, Meki MH, Miller JM, Giridharan G, El-Baz A, Bolli R and Mohamed TMA. Slicing and Culturing Pig Hearts under Physiological Conditions. *J Vis Exp.* 2020.
47. Kang C, Qiao Y, Li G, Baechle K, Camelliti P, Rentschler S and Efimov IR. Human Organotypic Cultured Cardiac Slices: New Platform For High Throughput Preclinical Human Trials. *Scientific Reports.* 2016;6:28798.
48. Morioka MS, Kawaji H, Nishiyori-Sueki H, Murata M, Kojima-Ishiyama M, Carninci P and Itoh M. Cap Analysis of Gene Expression (CAGE): A Quantitative and Genome-Wide Assay of Transcription Start Sites. *Methods in molecular biology (Clifton, NJ.* 2020;2120:277-301.
49. Li H and Durbin R. Fast and accurate long-read alignment with Burrows-Wheeler transform. *Bioinformatics (Oxford, England).* 2010;26:589-95.

50. McCarthy DJ, Chen Y and Smyth GK. Differential expression analysis of multifactor RNA-Seq experiments with respect to biological variation. *Nucleic Acids Res.* 2012;40:4288-97.
51. Ritchie ME, Phipson B, Wu D, Hu Y, Law CW, Shi W and Smyth GK. limma powers differential expression analyses for RNA-sequencing and microarray studies. *Nucleic Acids Res.* 2015;43:e47.

### **Acknowledgments**

TMAM is supported by NIH grants R01HL147921 and P30GM127607 and American Heart Association grant 16SDG29950012. The authors also acknowledge NIH grants P30GM127607 (BGH), R01HL130174 (BGH), R01HL147844 (BGH), R01ES028268 (BGH), GM127607 (DJC), P01HL78825 (RB, BGH) and UM1HL113530 (RB), Leducq Foundation RHYTHM grant (IRE), R01HL126802 (IRE), R44HL139248 (IRE) and an American Heart Association Postdoctoral fellowship (19POST34370122) to SAG. We acknowledge the guidance of Ruslan Deviatiiarov from the Institute of Fundamental Medicine and Biology, Kazan Federal University, Russia in the Cap Analysis of Gene expression data analysis.

### **Author contributions**

J.M.M, M.H.M, Q.O, S.A.G.: collection and analysis of data, manuscript writing, and final approval of manuscript; A.G., R.R.E.A., X-L.T., B.M.A. collection and analysis of data; G.A.G., A.E., B.G.H., J.S., D.J.C., J.M., R.B., A.J.S.R, I.R.E, and T.M.A.M: conception and design, manuscript writing, and final approval of manuscript.

### **Competing Interests**

TMAM, holds equities in Tenaya Therapeutics. GAG, is consultant for NuPulseCV. The other authors report no conflicts.

This article reflects the views of the authors and should not be construed to represent the views or policies of the FDA

### **Figure legends**

**Figure 1. Effect of cardiotoxins on heart slice viability and structure:** (a) Bar graph shows the quantification of heart slice viability after 2 days of treatment with the corresponding cardiotoxin using MTT assay (n=2 independent experiments, 4 replicates in each, One-Way ANOVA test was conducted to compare between groups; \*P<0.05 compared to the control). (b) Representative immunofluorescence images showing the expression of connexin 43 (red) in cardiomyocytes (green) in cross sections taken from heart tissue slices treated for 2 days with the corresponding concentration of the cardiotoxin (Scale bar, 100  $\mu$ m). These representative images have been reproducible over 2 independent experiments with 3 technical replicates in each experiment; however, the lack of reliable tools for quantifying localization of connexin 43 has limited our ability for quantification.

**Figure 2. Effect of cardiotoxins on heart slices functionality and calcium homeostasis:** (a) Representative calcium traces from day 2 cultured control slices and heart slices treated with the corresponding concentration of each cardiotoxin for 2 days. Transients were recorded after loading the heart slices with Fluo-4 calcium dye and using 1 Hz/20 V electrical stimulation at the time of recording. (b) Scoring of calcium transient amplitude as indication of the cardiomyocyte function from slices treated with each cardiotoxin (n=36 cells in each group from 2 independent experiments).

**Figure 3. Differential gene expression in slices treated with 100 nM doxorubicin:** (a) Volcano plot showing significant changes in gene expression in 100nM doxorubicin (Dox) treated tissue. Bar graph shows the GO terms for the significantly downregulated (b) or

upregulated (**C**) genes from RNA-seq data between control heart slices and heart slices treated with 100nM doxorubicin (n=2 pig hearts).

**Figure 4. Differential gene expression in slices treated with 1 $\mu$ g trastuzumab:** (a) Volcano plot demonstrating the genes which are significantly different between control heart slice and slices treated with 1 $\mu$ g trastuzumab. Bar graph shows the GO terms for the significantly downregulated (**b**) or upregulated (**c**) genes from RNA-seq data between control heart slices and heart slices treated with 1 $\mu$ g trastuzumab (n=2 pig hearts).

**Figure 5. Differential gene expression in slices treated with 100nM sunitinib:** (a) Volcano plot demonstrating the genes which are significantly different between control heart slice and slices treated with 100nM sunitinib. Bar graph shows the GO terms for the significantly downregulated (**b**) or upregulated (**c**) genes from RNA-seq data between control heart slices and heart slices treated with 100nM sunitinib (n=2 pig hearts).

**Figure 6. Pro-apoptotic effect of doxorubicin and sunitinib on hiPSC-CMs:** Kinetics of caspase-3/7 activation in hiPSC-CMs exposed to a range of concentrations of (a) aspirin (non-toxic drug), (b) doxorubicin (cardiotoxin), (c) erlotinib (non-cardiotoxic TKI) and (d) sunitinib (cardiotoxic TKI) over 48 h. DMSO in the medium at a concentration of 0.1% (v/v) was used as a control. (A-D) Variations in total caspase integrated intensity was calculated from fluorescent images of the caspase-3/7 green dye acquired every hour, which captured the extent of apoptosis within cultured cells. Acute apoptotic effects were detected upon exposing cells to 60  $\mu$ M of sunitinib as noted by the arrow in (d). (e and f) Phase microscopy images of cells acquired when 60  $\mu$ M of sunitinib was added to cells (e) and one hour after being exposure (f), where total cell detachment was observed. Scale bar: 200  $\mu$ m.

**Figure 7. Doxorubicin toxicity in human heart slices:** (a) Activation maps obtained by optical mapping of human cardiac organotypic slices cultured for ~24 h with or without doxorubicin (50

$\mu\text{M}$ ). Crowding of activation lines in the transverse direction indicate conduction slowing with doxorubicin treatment. **(b)** Average transverse conduction velocity determined from human cardiac slices with and without doxorubicin treatment. Transverse conduction velocity was significantly slower in doxorubicin treated slices ( $n=7$ ,  $p<0.05$ ). **(c)** Differentially expressed genes between control and doxorubicin-treated human cardiac organotypic slices following Cap Analysis of Gene Expression ( $n=3$ ). **(d)** Gene ontology (GO) enrichment analysis of differentially expressed genes in control and doxorubicin-treated slices. BP: biological process, CC: cellular component, MF: molecular function ( $n=3$ ). **(e)** Heat map demonstrating hierarchical clustering of differentially expressed genes ( $n=3$ ). F: female, M: male.



# Figure 1

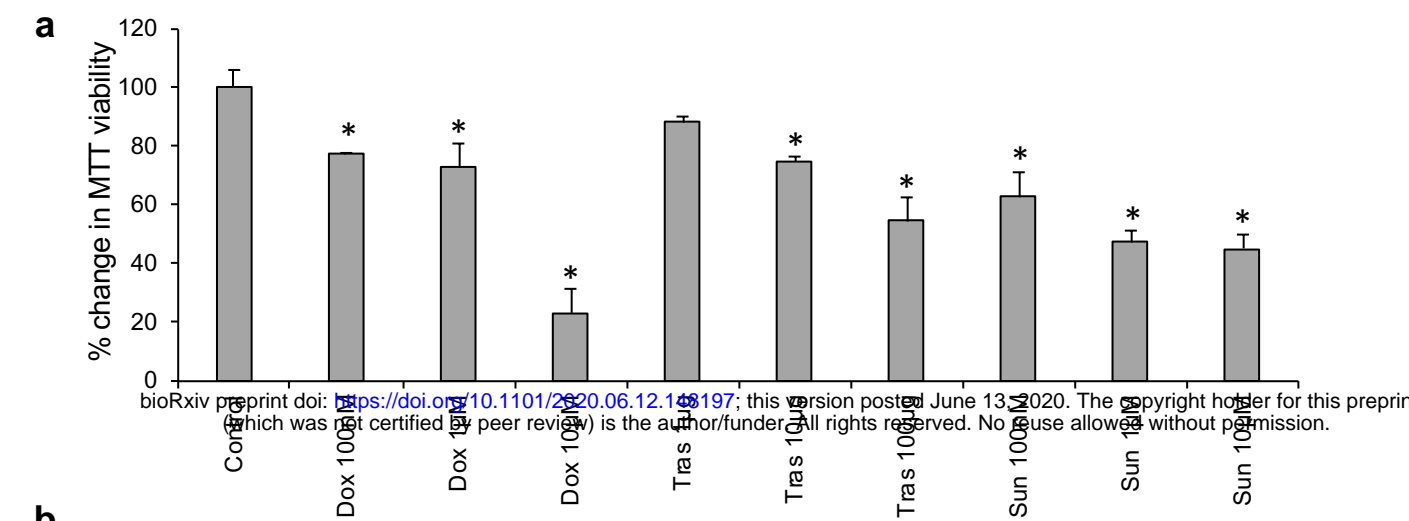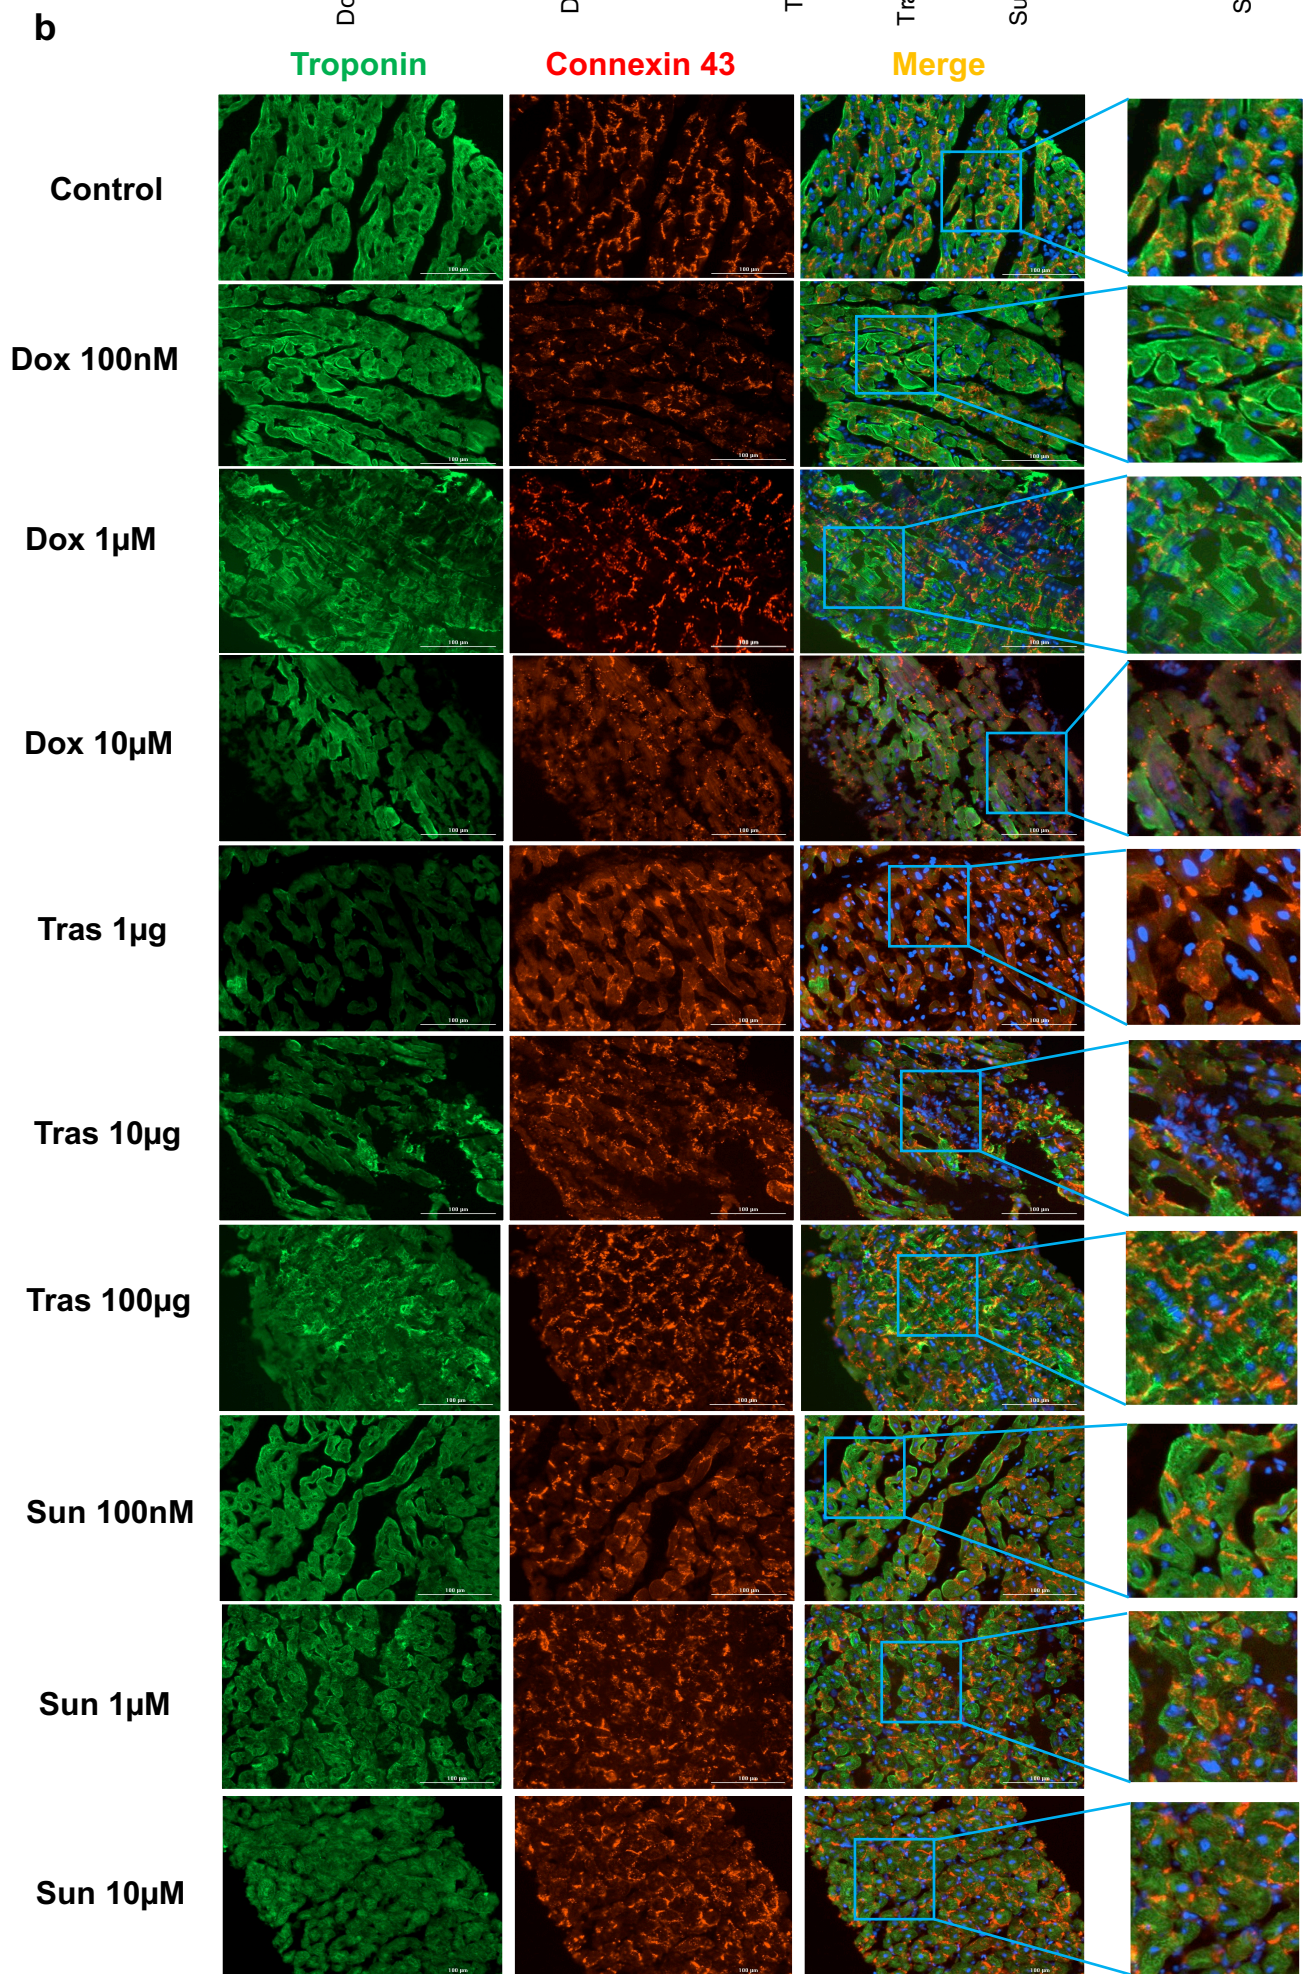

**Figure 2**

**a**

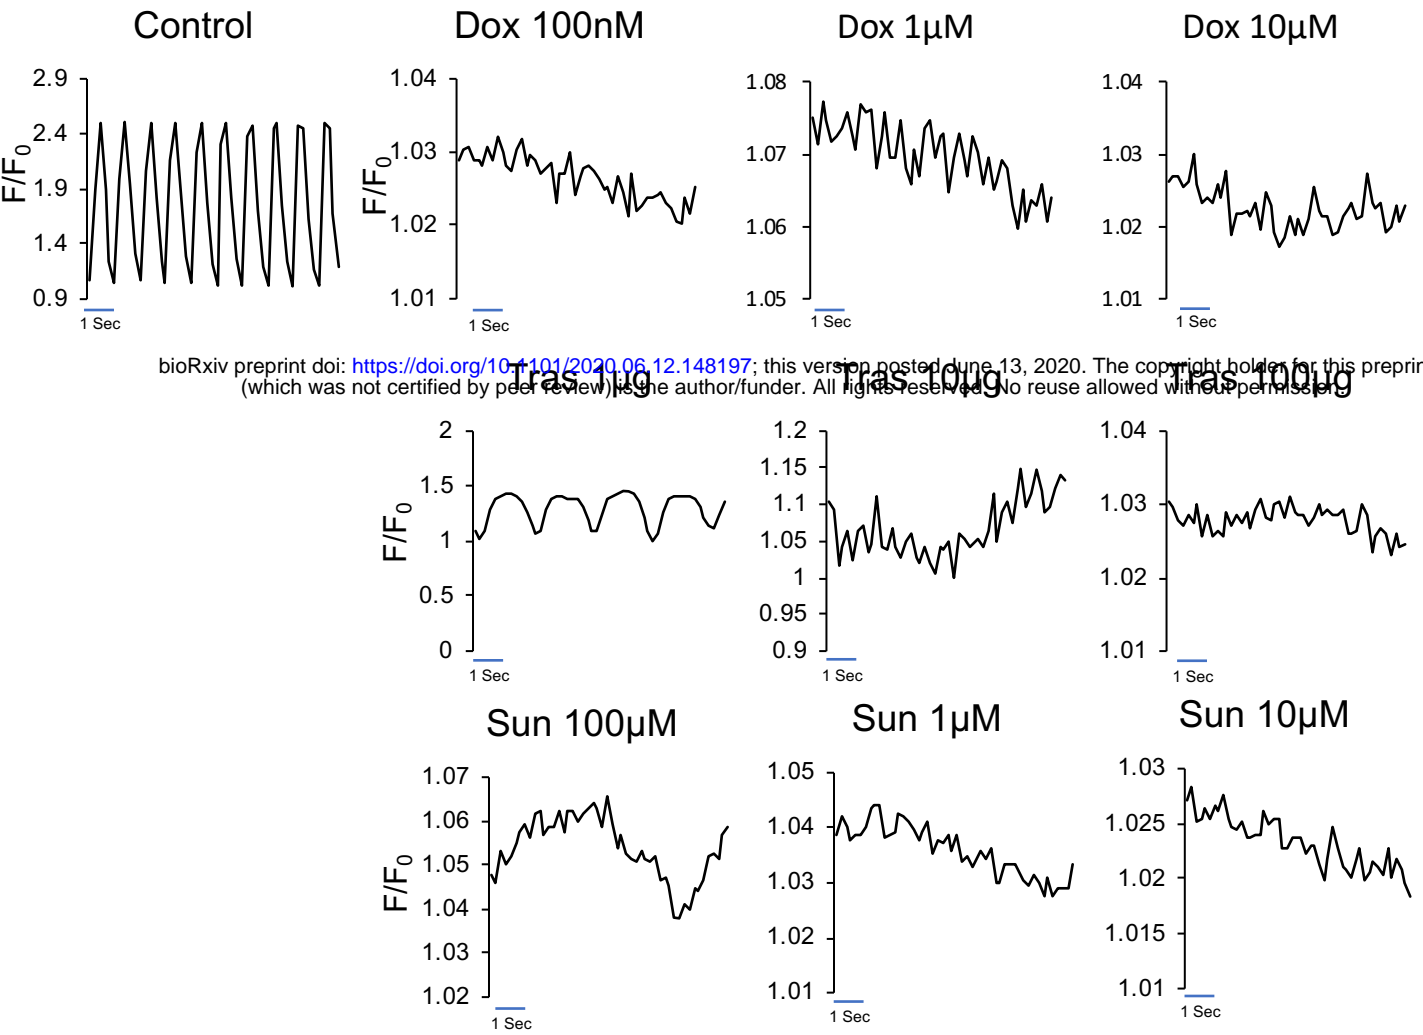

bioRxiv preprint doi: <https://doi.org/10.1101/2020.06.12.148197>; this version posted June 13, 2020. The copyright holder for this preprint (which was not certified by peer review) is the author/funder. All rights reserved. No reuse allowed without permission.

**b**

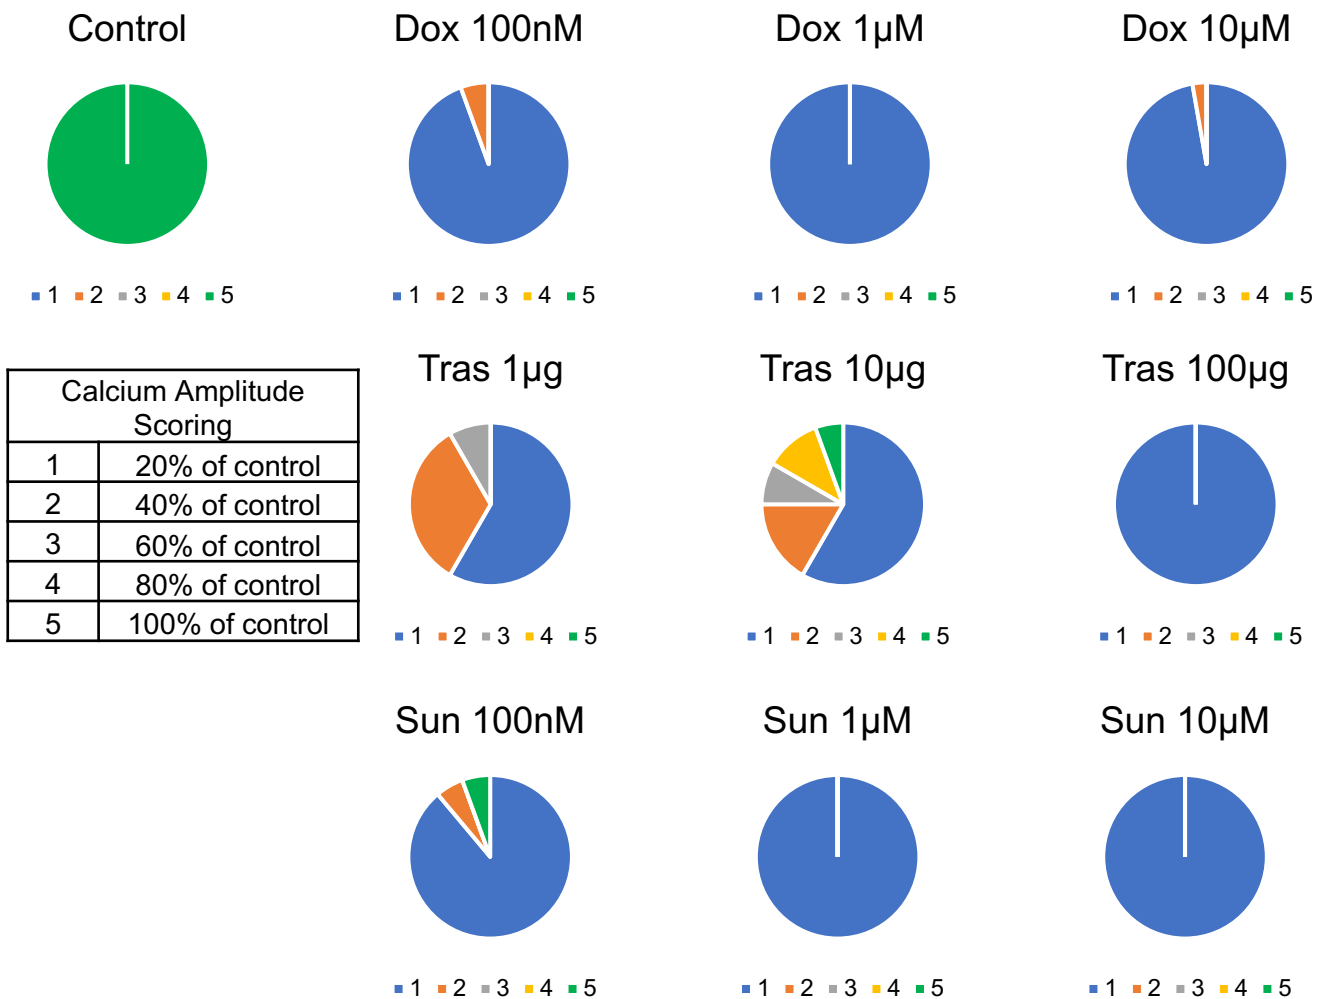



**Figure 3****a**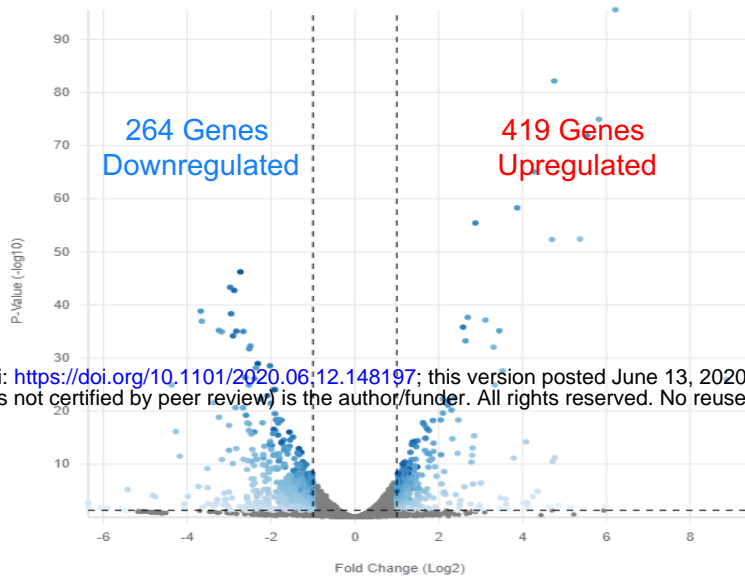

bioRxiv preprint doi: <https://doi.org/10.1101/2020.06.12.148197>; this version posted June 13, 2020. The copyright holder for this preprint (which was not certified by peer review) is the author/funder. All rights reserved. No reuse allowed without permission.

**b****Downregulated GO terms**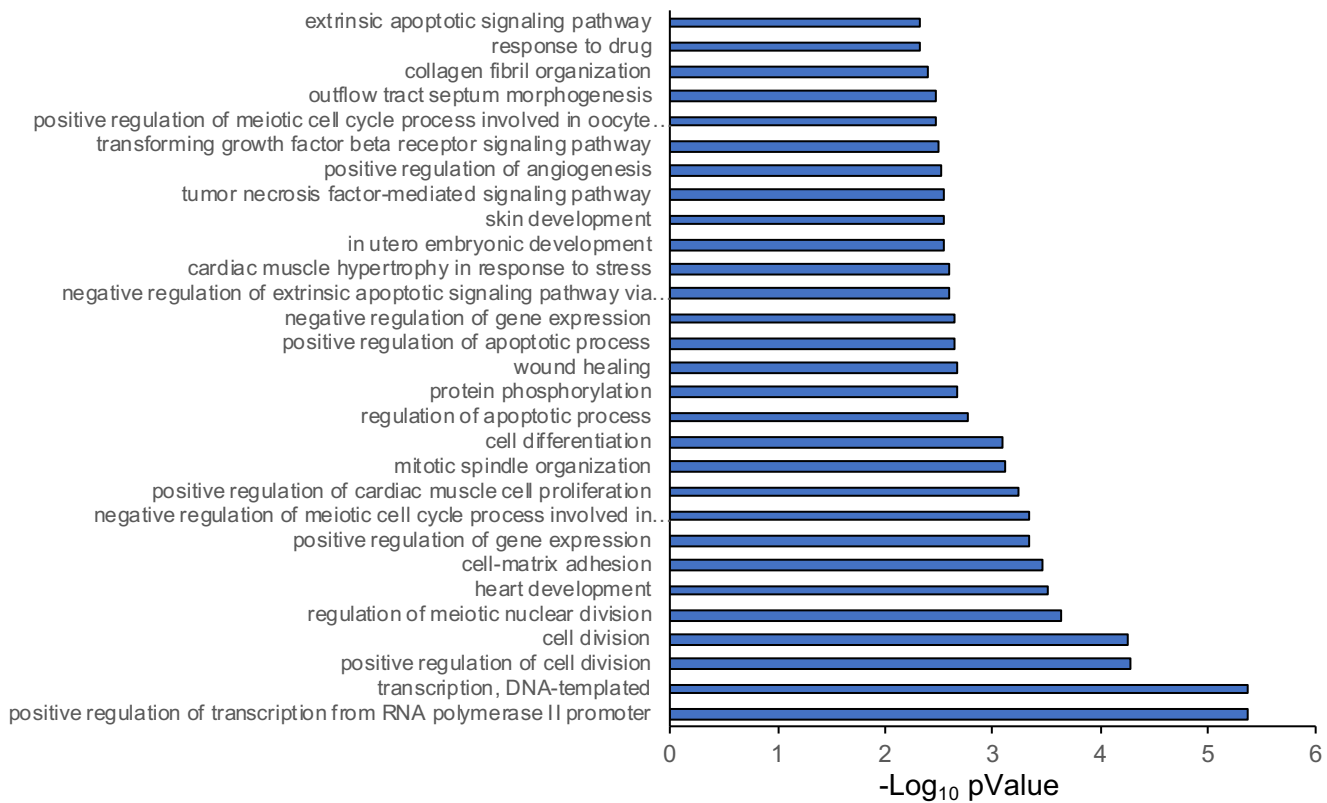**c****Upregulated GO terms**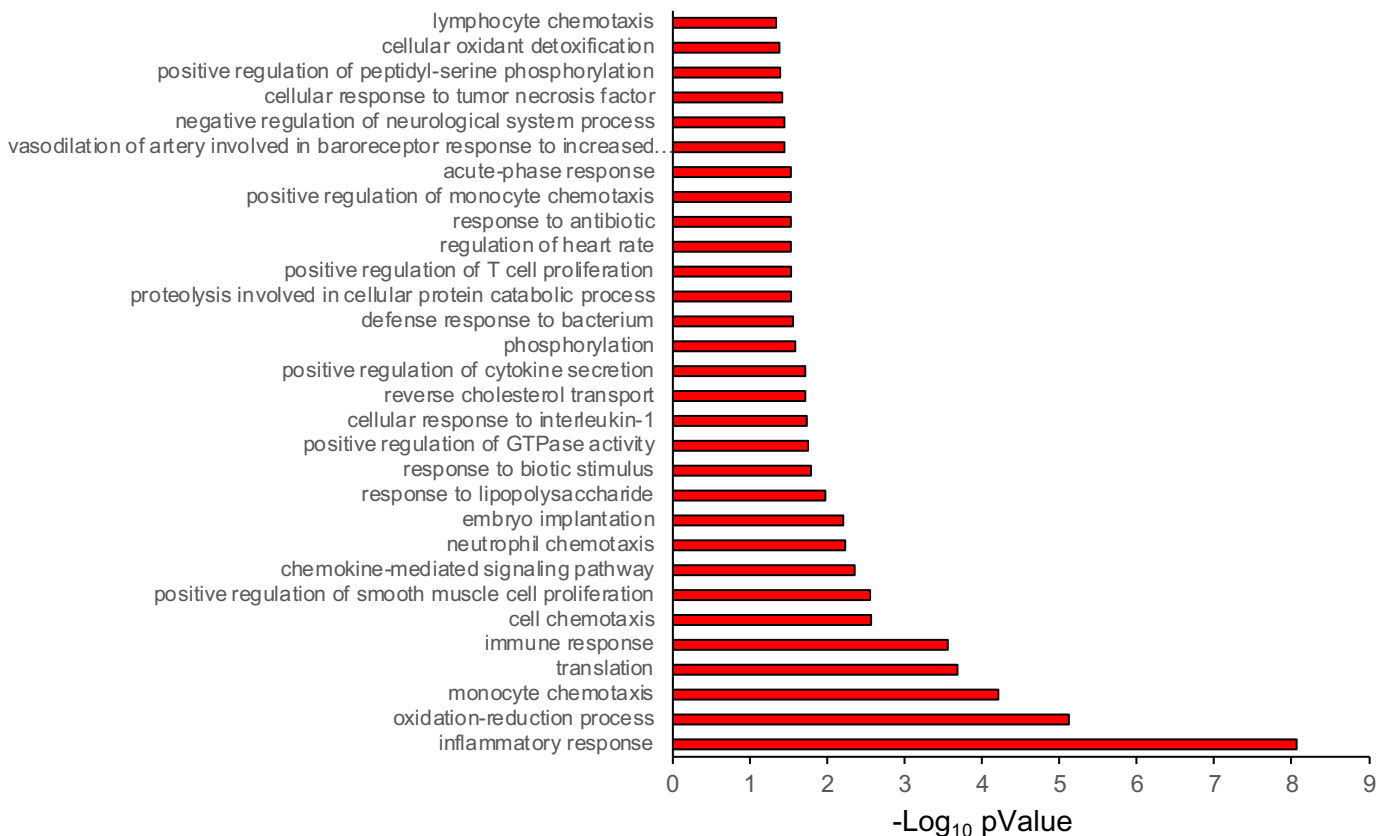

**Figure 4**

**a**

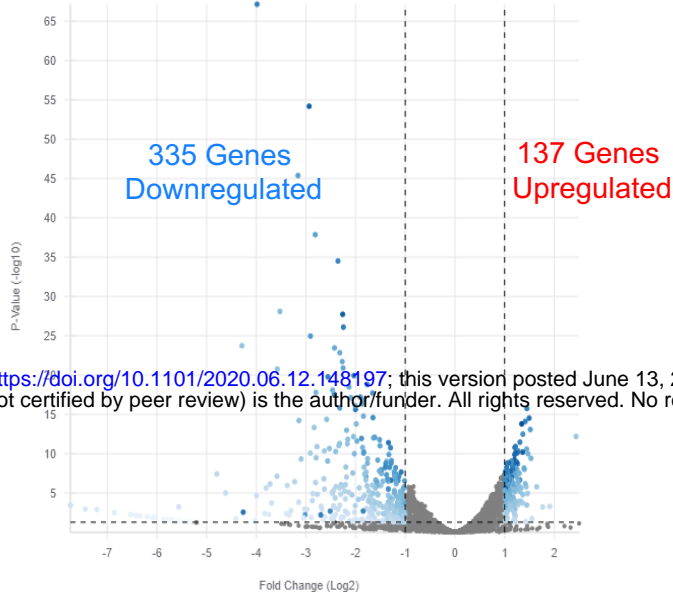

bioRxiv preprint doi: <https://doi.org/10.1101/2020.06.12.148197>; this version posted June 13, 2020. The copyright holder for this preprint (which was not certified by peer review) is the author/funder. All rights reserved. No reuse allowed without permission.

**b**

**Downregulated GO terms**

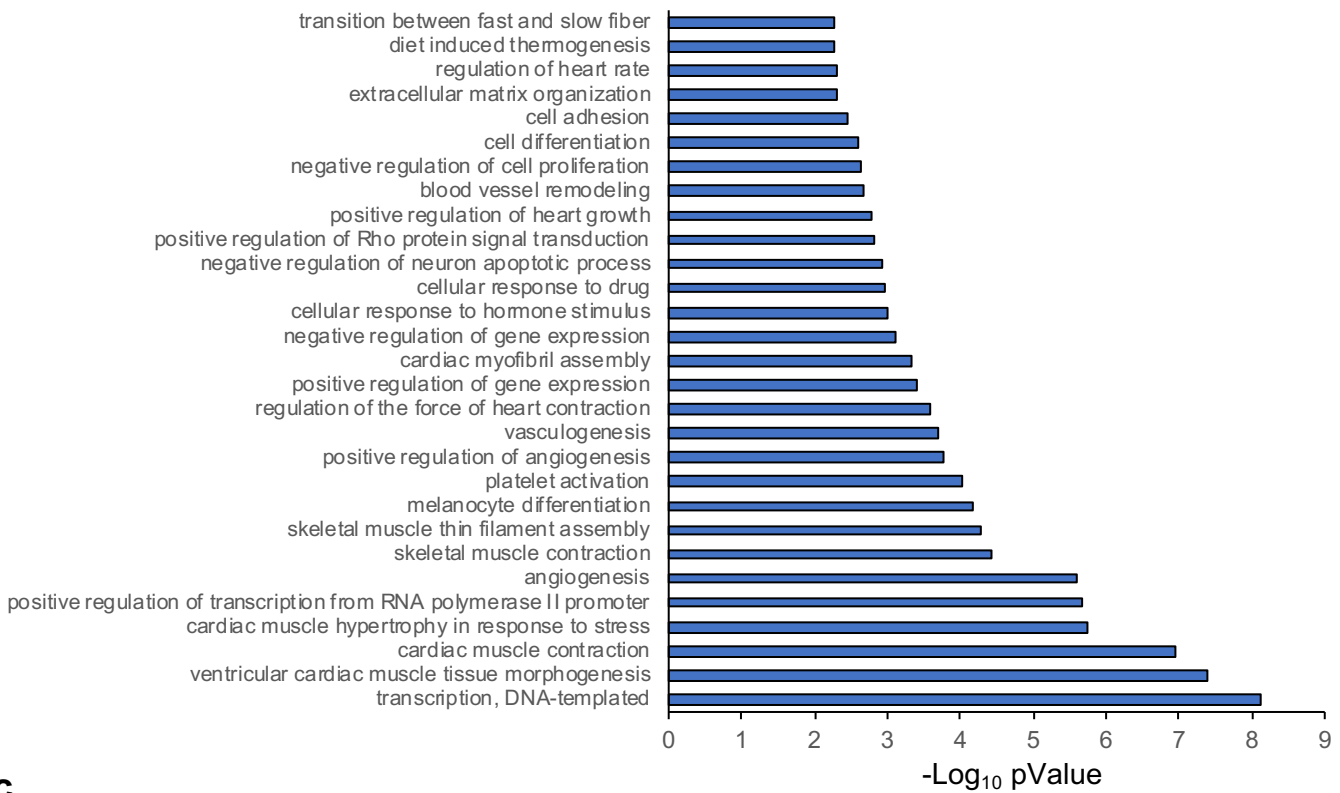

**c**

**Upregulated GO terms**

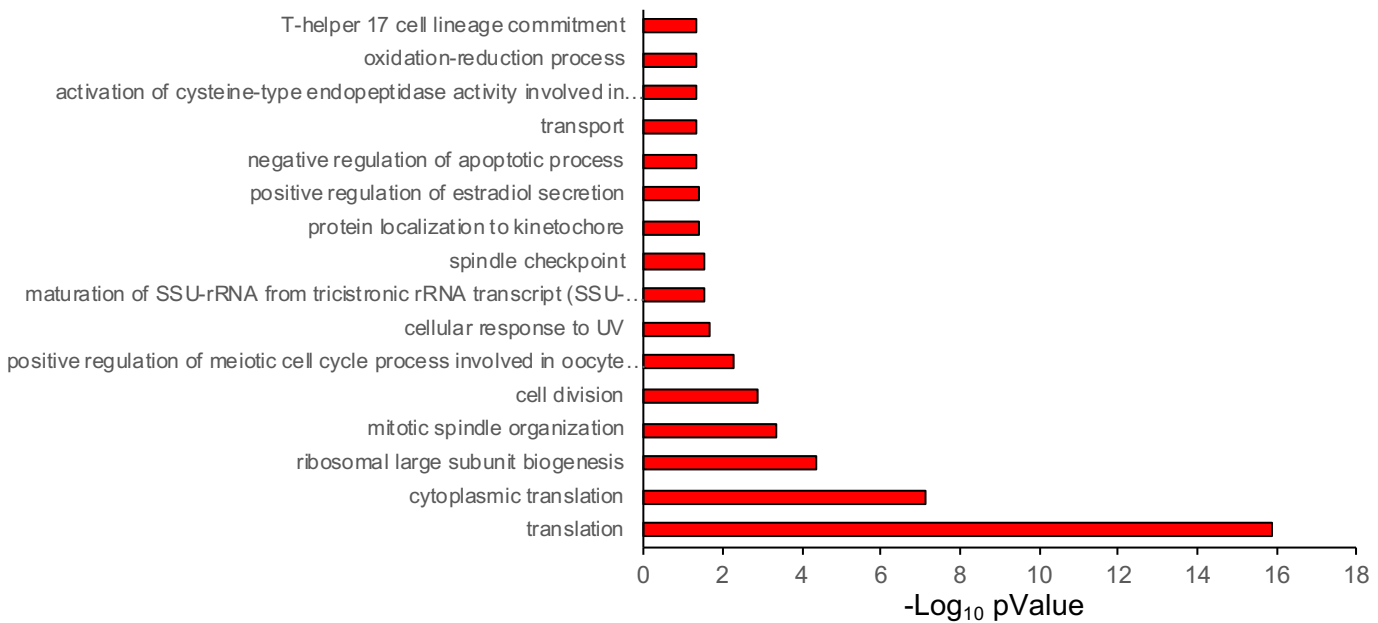

**Figure 5**

**a**

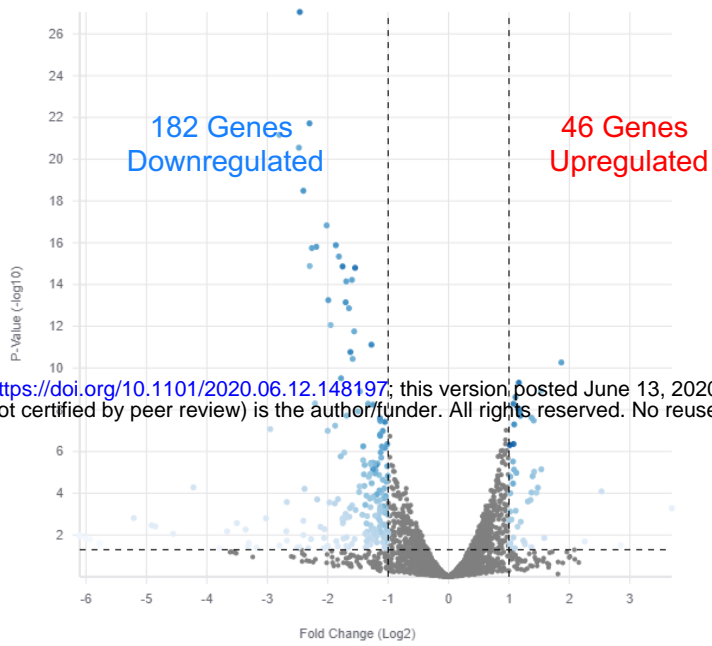

**b**

**Downregulated GO terms**

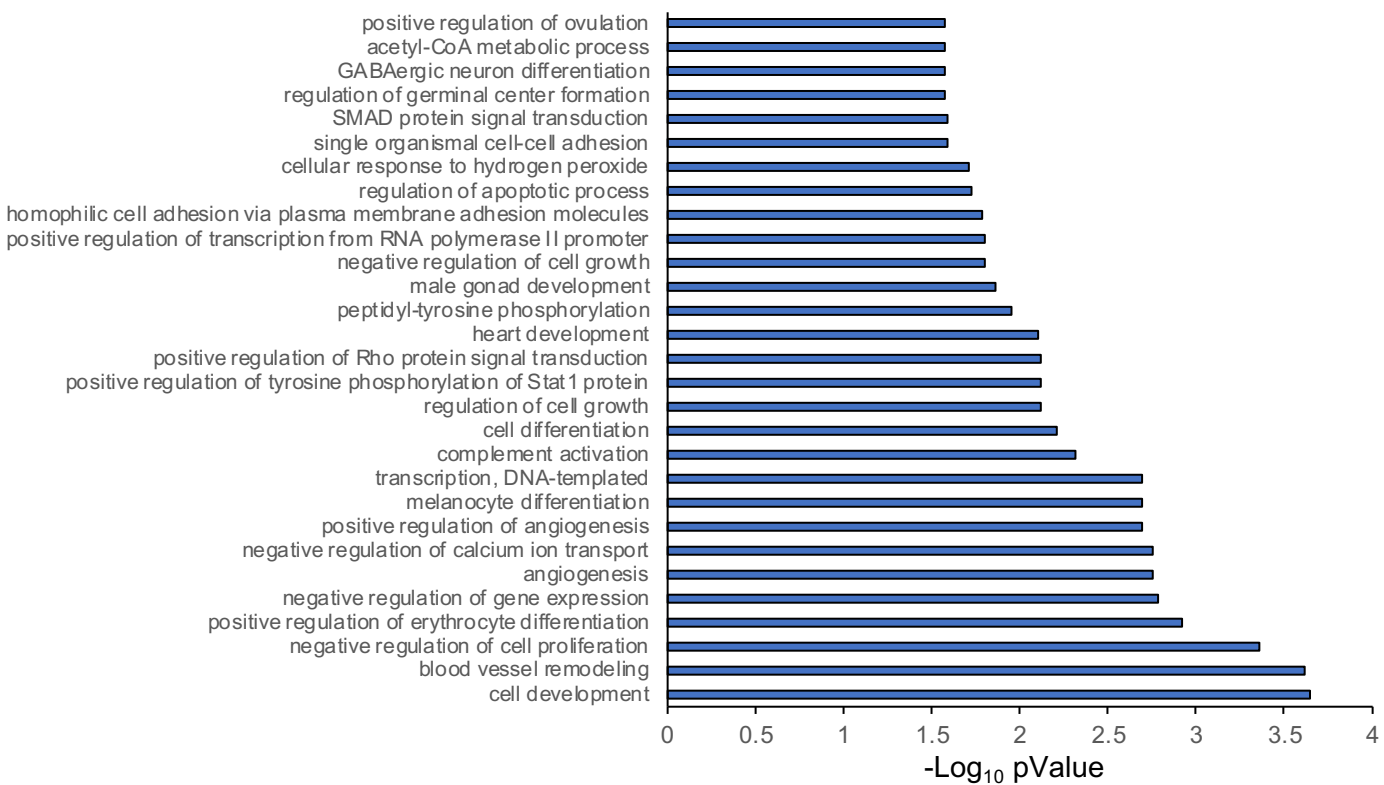

**c**

**Upregulated GO terms**

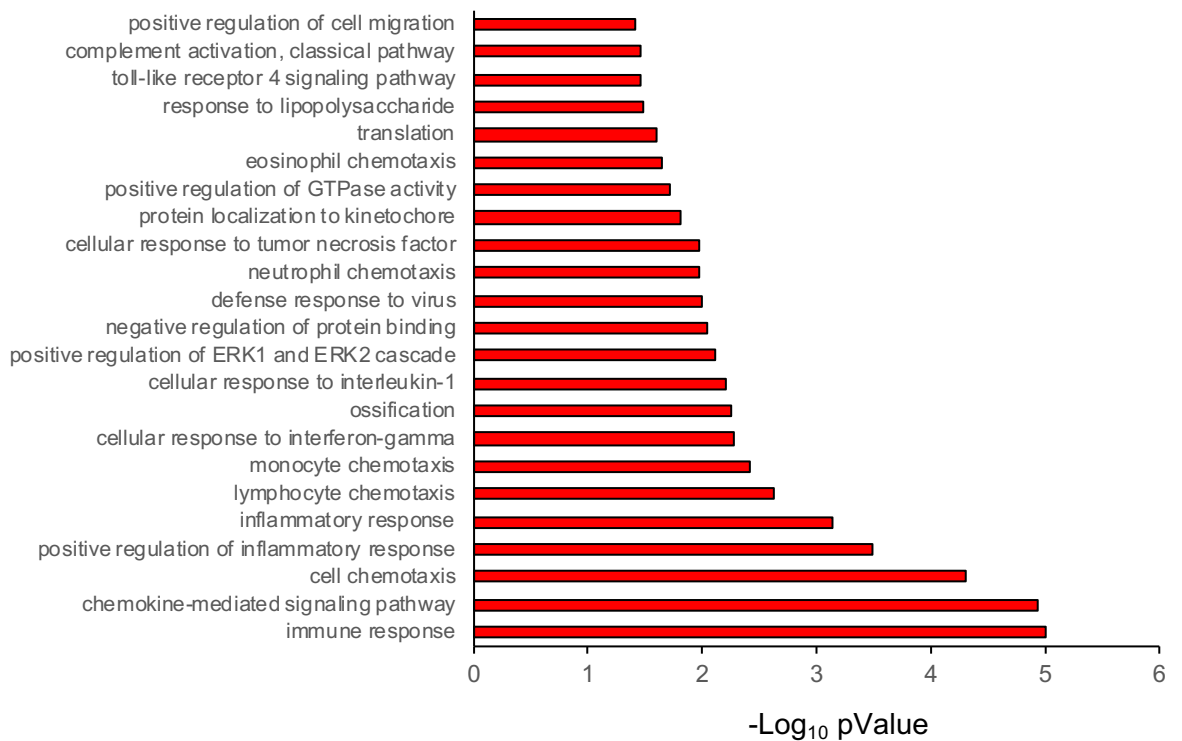

## Figure 6

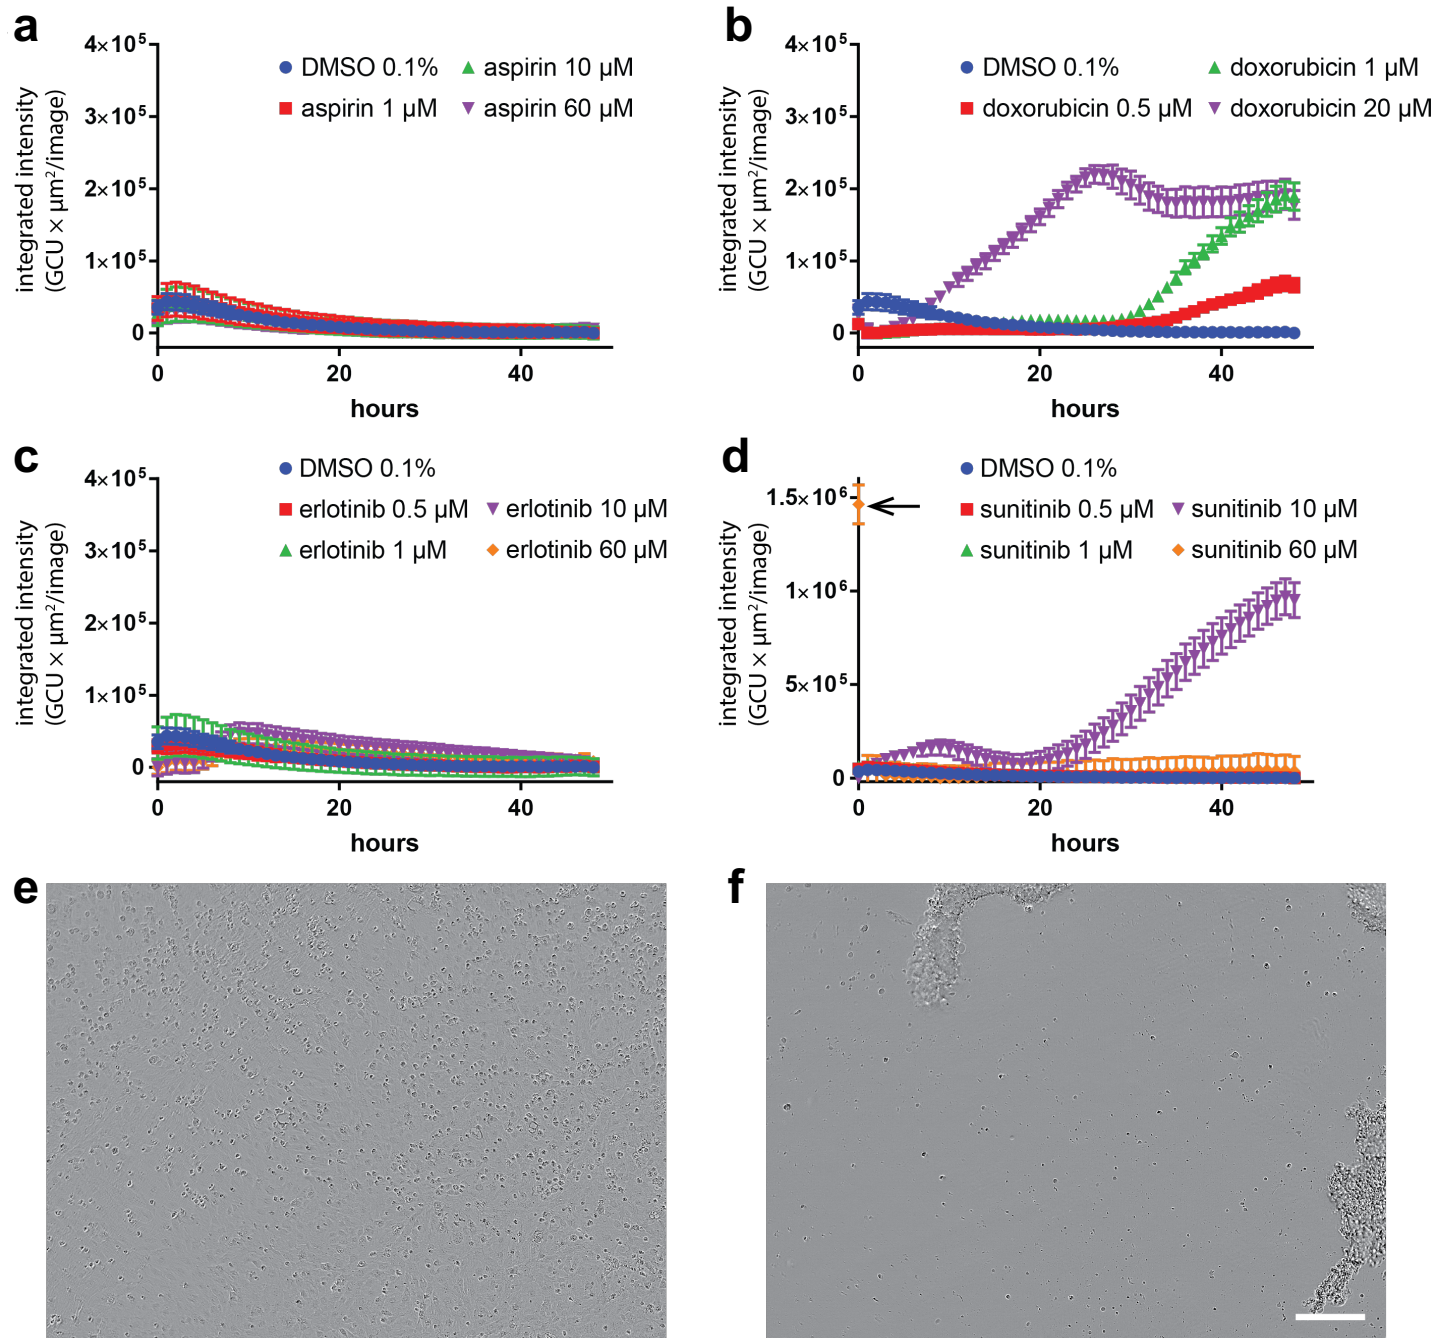

**Figure 7**

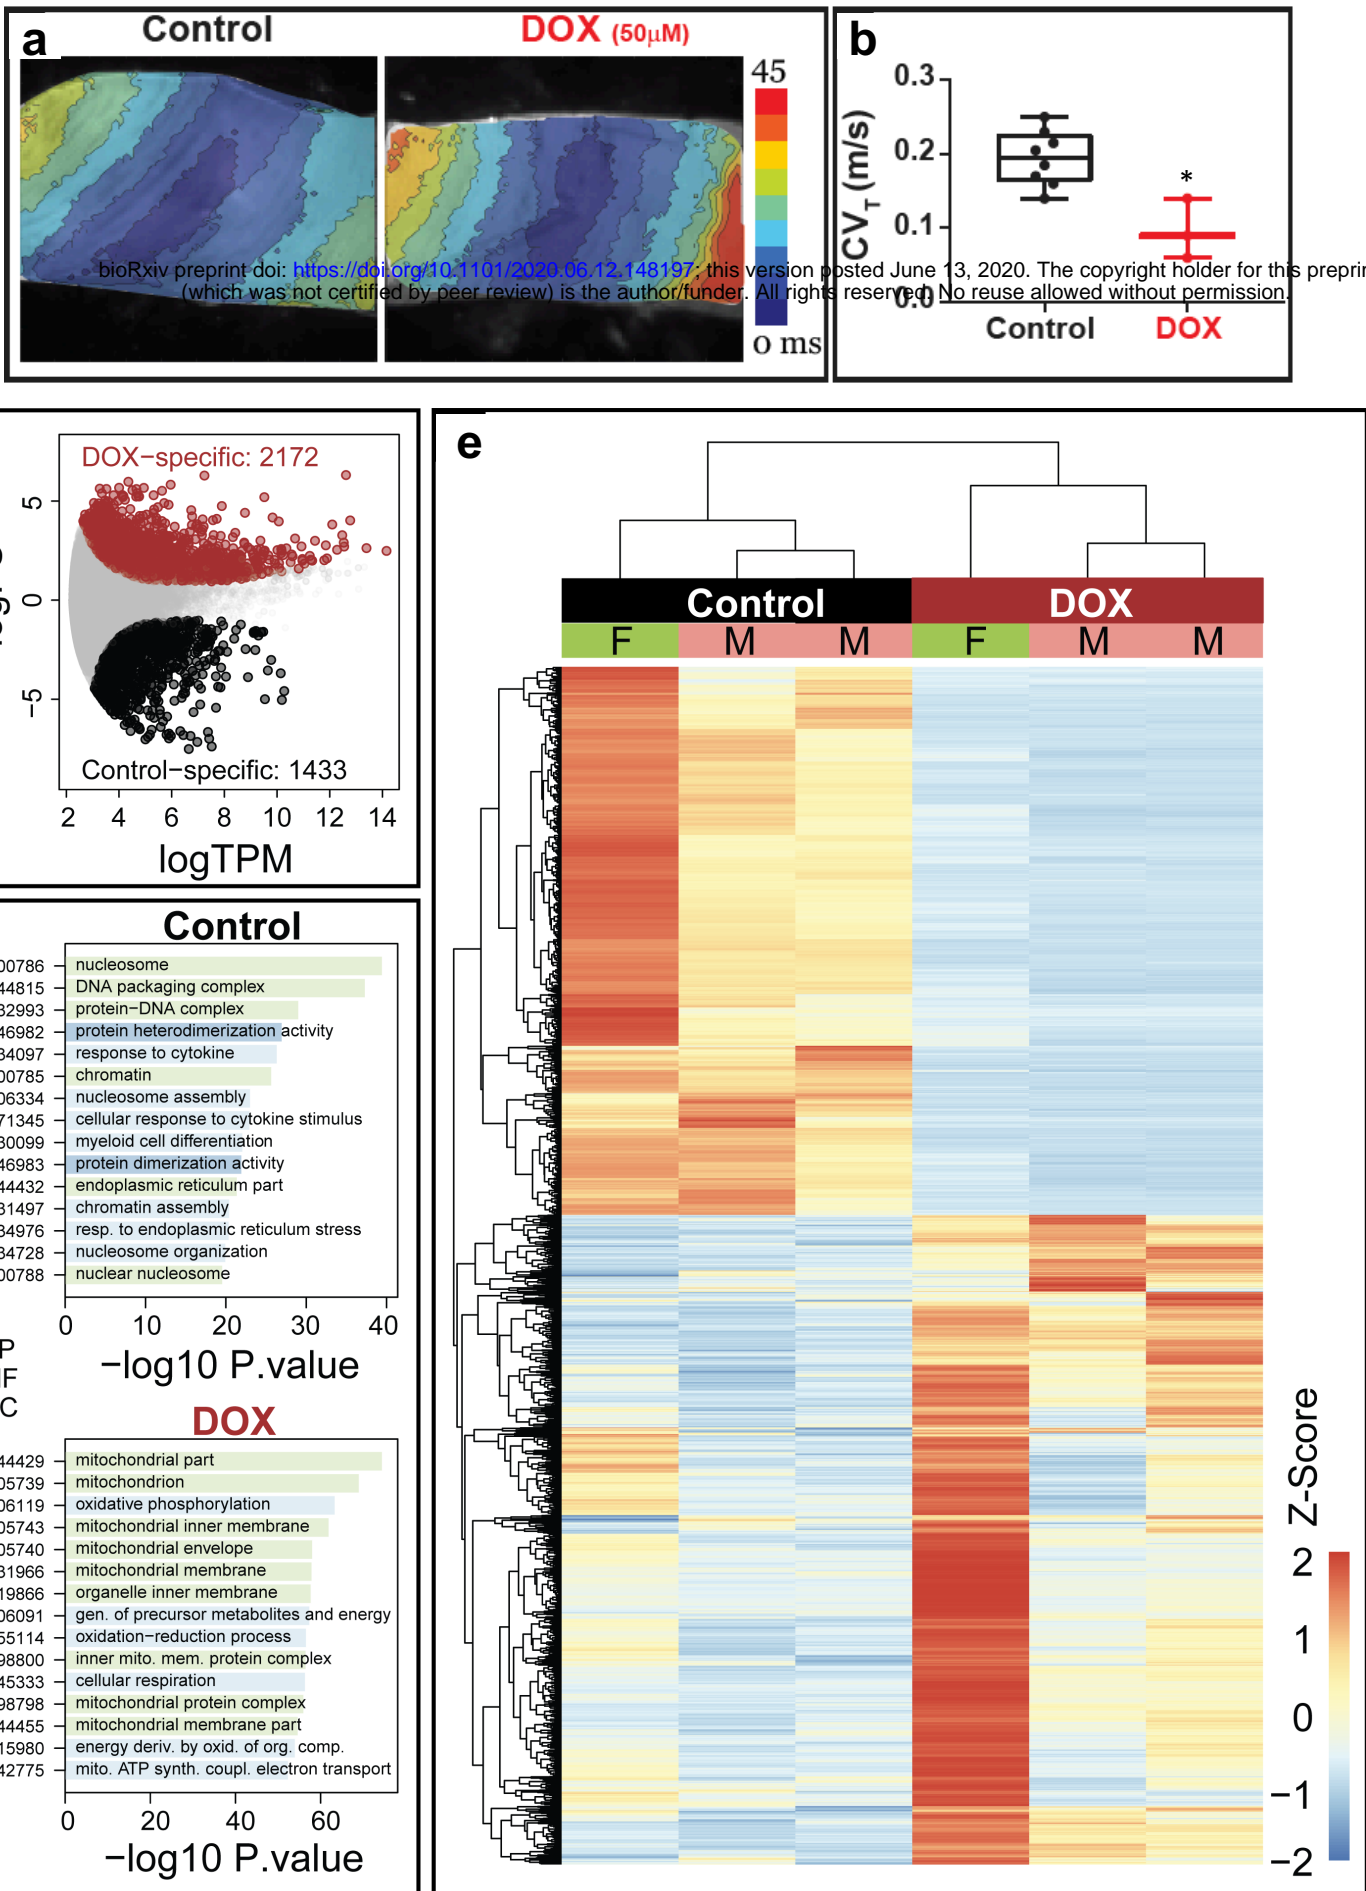

Source: https://www.biorxiv.org/content/10.1101/2020.06.12.148197v1.full.pdf
